# Supplementary material for: Intervertebral disc organ-on-a-chip: an innovative model to study monocyte extravasation during nucleus pulposus degeneration
Source: Royal Society of Chemistry journal article supplement (doi:10.1039/d3lc00032j), 2023-01-01
Supplement: d3lc00032j1.pdf [file d3lc00032j1.pdf]

Electronic Supplementary Information (ESI)\_Figure S1.

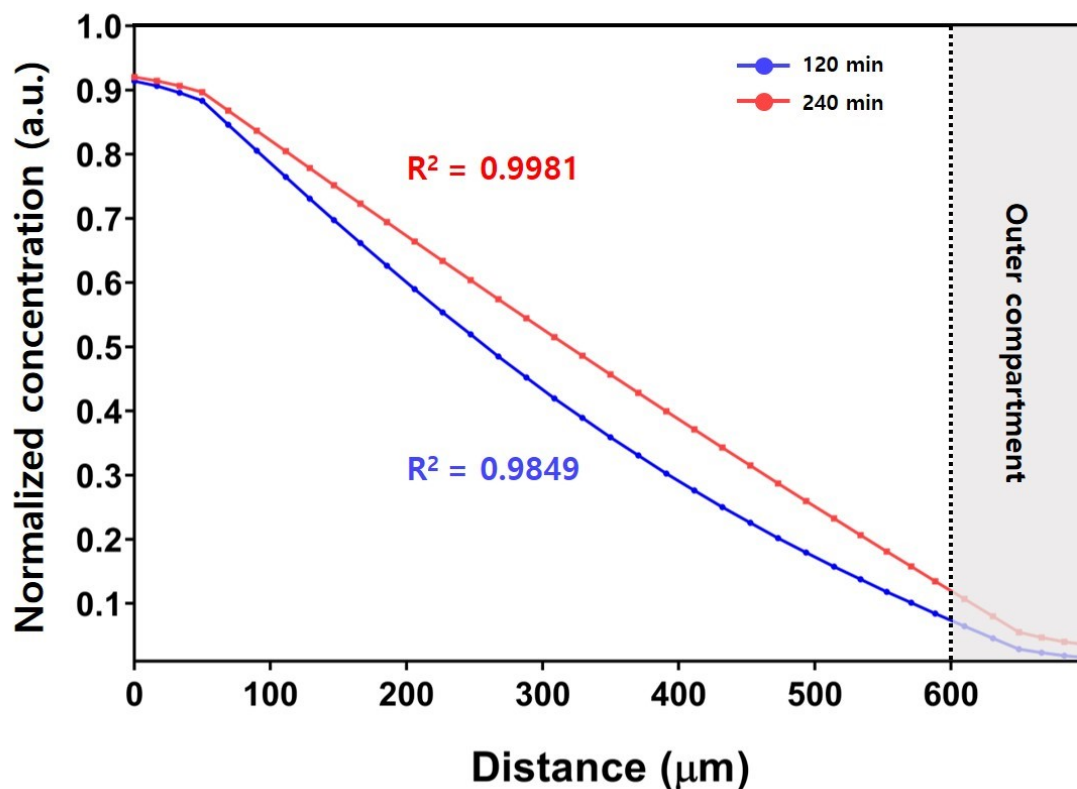

Figure S1. The diffusion profile of the chemo-attractants was characterized by measuring the gradient and normalized concentration plot over a period of 120 and 240 min (Linearity  $R^2$  values are 0.9849 and 0.9981, respectively) using COMSOL software.
