# Supplementary figures and images for: Intervertebral disc organ-on-a-chip: an innovative model to study monocyte extravasation during nucleus pulposus degeneration
Source: Royal Society of Chemistry journal article supplement (doi:10.1039/d3lc00032j), 2023-01-01

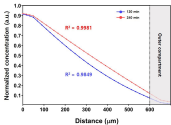

Supplement: d3lc00032j3.pdf [file d3lc00032j3.pdf]
